# Supplementary material
Source: publisher site journal article supplement (https://www.dovepress.com/article/443425)
Supplement: Supplementary file 1 [file get_supplementary_file.php]

**SUPPLEMENTARY**

**SFigure 1. Dr Hasan Sadikin Hospital Screening Protocol for Palliative Care**

**STable 1: Survival Function on Covariates**

**
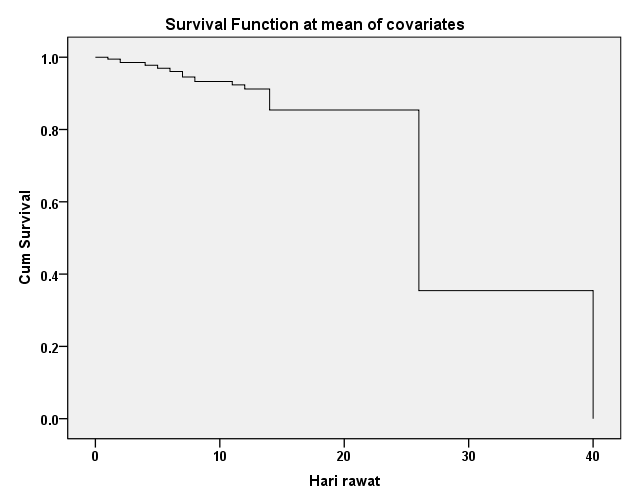
**

**STable 2: Survival Function using Early Warning Score**


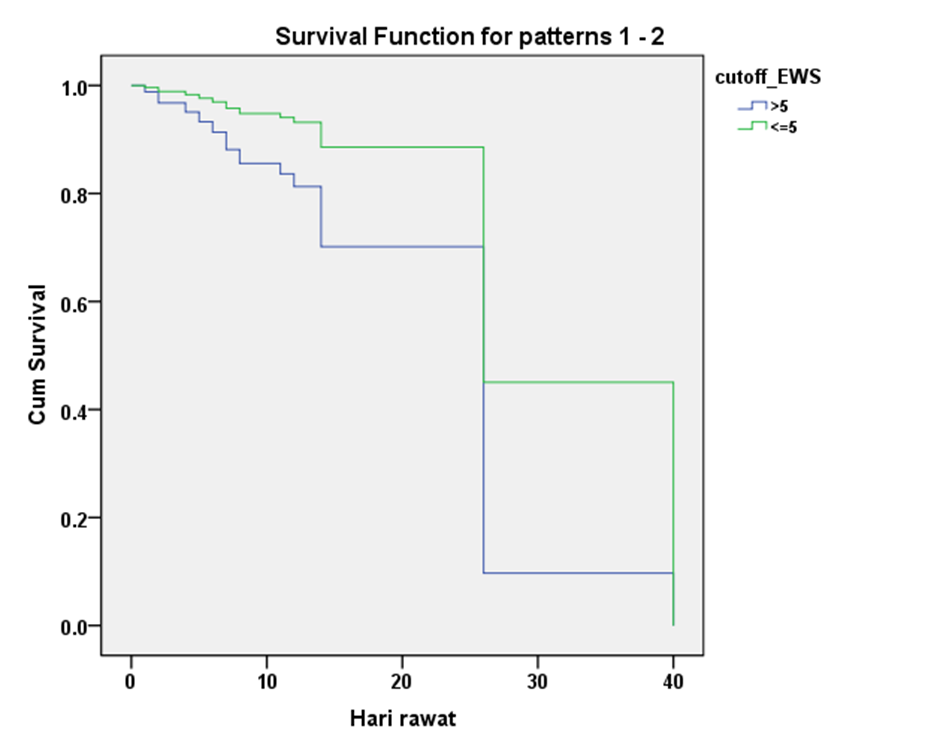


**Days of Inpatient Care**
